# Supplementary material for: Using Machine Learning to Predict Bacteremia in Febrile Children Presented to the Emergency Department
Source: PubMed Central journal article supplement (PMC7277905; doi:10.3390/diagnostics10050307), 2020-05-15
Supplement: diagnostics-10-00307-s001.pdf [file diagnostics-10-00307-s001.pdf]

**Supplemental Table 1.** The odds ratio of each variable and its 95%CI after repeating 100 times univariate logistic regression in subgroup study.

| Variable     | OR     | OR (95%CI)           | Number of<br>P-value < 0.05 |
|--------------|--------|----------------------|-----------------------------|
| AGE          | 0.9552 | ( 0.6469 - 1.4026 )  | 0                           |
| WBC          | 0.8965 | ( 0.7656 - 1.0401 )  | 5                           |
| CRP          | 1.0070 | ( 1.0027 - 1.0112 )  | 100                         |
| Hemoglobin   | 0.6378 | ( 0.2347 - 1.9165 )  | 0                           |
| MCV          | 0.9509 | ( 0.3990 - 2.4978 )  | 0                           |
| MCH          | 1.5593 | ( 0.1012 - 18.1577 ) | 0                           |
| MCHC         | 0.9889 | ( 0.1299 - 9.9122 )  | 0                           |
| Platelet     | 0.9998 | ( 0.9973 - 1.0023 )  | 0                           |
| Lymphocyte   | 0.9861 | ( 0.9708 - 1.0016 )  | 24                          |
| AST          | 1.0046 | ( 0.9933 - 1.0152 )  | 2                           |
| ALT          | 0.9991 | ( 0.9835 - 1.0119 )  | 0                           |
| RBC          | 2.4156 | ( 0.1148 - 39.5038 ) | 0                           |
| Band         | 1.0732 | ( 0.9417 - 1.2074 )  | 8                           |
| Monocyte     | 0.9760 | ( 0.9269 - 1.0244 )  | 0                           |
| Eosinophil   | 0.7661 | ( 0.5911 - 0.9558 )  | 84                          |
| Basophil     | 1.4543 | ( 0.6893 - 2.8285 )  | 0                           |
| ANC          | 1.1907 | ( 0.9341 - 1.5174 )  | 9                           |
| Segment+Band | 0.9694 | ( 0.9427 - 0.9975 )  | 67                          |

WBC, white blood cell; ANC, absolute neutrophil count; MCV, mean corpuscular volume; MCH, mean corpuscular hemoglobin; MCHC, mean corpuscular hemoglobin concentration; ALT, alanine transaminase; AST, aspartate transaminase; CRP, C-reactive protein.

**Supplemental Table 2.** The maximum value, minimum value, mean value, and standard deviation of multivariate binary logistic regression coefficients of significant risk factors in subgroup study.

| Variable     | min     | - | Max     | ( | Mean    | ± | SD     | ) |
|--------------|---------|---|---------|---|---------|---|--------|---|
| CRP          | 0.0041  | - | 0.0084  | ( | 0.0062  | ± | 0.0011 | ) |
| EOSINOPHIL   | -0.2891 | - | -0.1597 | ( | -0.2294 | ± | 0.0284 | ) |
| Segment+Band | -0.0481 | - | -0.0192 | ( | -0.0324 | ± | 0.0060 | ) |

CRP, C-reactive protein.
